# Supplementary material for: Ecological flexibility and adaptation to past climate change in the Middle Nile Valley: A multiproxy investigation of dietary shifts between the Neolithic and Kerma periods at Kadruka 1 and Kadruka 21
Source: PLoS One. 2023 Feb 2;18(2):e0280347. doi: 10.1371/journal.pone.0280347 (PMC9894462; doi:10.1371/journal.pone.0280347)
Supplement: S2 File — (XLSX) [file pone.0280347.s002.xlsx]

## Sheet: Calculus Data
S2 File. Results from Dental Calculus and Sediment Samples
										Diagnostic Phytolith Morphotypes																						Non-Diagnostic Phytolith Morphotypes					Starch Granules						Other Microremains
										Grass Short Cell Morphotypes					Grass Elongate Morphotypes					Other Grass Morphotypes			Tree / shrub
Individual ID	Site	Phase	Sampled Tooth	Calculus Fraction (p / s)	Sample Weight (mg)	Extract Weight (mg)	0.5M EDTA duration (hrs)	Bilobate	Polylobate	Cross	Rondel	Saddle	Trapezoid	Clavate	Dendritic	Dentate	Sinuate	Articulated elongate (non-Interdigitate)	Bulliform flabellate	Interdigitate	Acute bulbosus, Papillate	Spheroid Echinate	Ellipsoid Echinate	Spheroid (psilate / ornate)	Blocky (tabular / irregular / facetate)	Tracheary (annulate/helical)	Other tree/shrub silica bodies	Total grass	Total tree/shrub	Total grass + tree/shrub	Elongate (entire / irregular)	Indeterminate	Mesophyll	Total phytoliths	Type 1 (cf. Panicoid)	Type 2 (cf. Panicoid)	Type 3 (Faboideae)	Type 4 (cf. Fabaceae)	Type 5 (Triticeae)	Indeterminate	Total starch granules	Spicules	Feather barbule	Spores
SK 3	Kadruka 1	Kerma	MAXLM1; MAXLM2	p	1.76	0.64	6					1												1				1	1	2		1		3							0
SK 9	Kadruka 1	Kerma	MNDLM3, Supragingival Buccal	s	2.65	0.72	12					3							1		1	1						5	1	6				6	1					2	3
				p	4.57	2.47	6	2			4	7				1		1				2						15	2	17			1	18							0
SK 24	Kadruka 1	Kerma	MAXRM1-3	s	4.1	0.89	12	1																2				1	2	3				3							0
				p	5.4	1.75	6	1				1																2	0	2	1			3							0	1
SK 26	Kadruka 1	Kerma	MNDPM3/4; MNDM1-3, Supragingival Lingual	s	13.5	2.72	48																					0	0	0				0							0
SK 38	Kadruka 1	Kerma	MNDPM3/4; MNDM1-3	s	2.09	0.87	12	1																				1	0	1		1	6	8							0
SK 60	Kadruka 1	Kerma	MNDPM3/4; MNDM1-3	p	2.25	1.56	6					2													1			2	1	3				3							0
SK 63	Kadruka 1	Kerma	MNDRPM3; MNDRPM4	s	1.8	0.27	12																					0	0	0				0							0
SK 78	Kadruka 1	Kerma	MAXLM2	s	1.4	0.63	6																	1	2			0	3	3		2		5					1		1
SK 87a	Kadruka 1	Kerma	MAXPM3/4	s	1.7	0.53	12																					0	0	0				0							0
SK 37	Kadruka 1	Neolithic	MAXRM1	s	0.72	0.3	12	1				1								2		2					2	4	4	8				8							0
SK 39	Kadruka 1	Neolithic	MNDLM3	s	4.7	0.18	48																					0	0	0				0							0
SK 42	Kadruka 1	Neolithic	MAXRM2	s	2.5	0.18	12	2								1					1			1	2		1	4	4	8				8							0			1
SK 55	Kadruka 1	Neolithic	MAXRM1; MAXRM2, Subgingival Lingual	s	16.37	0.83	12							3	6	5		1		4	1				1		1	20	2	22		1		23							0	1
				p	9.02	1.63	6					2		5	2	11		5		12	2	1			3	1		39	5	44	5		4	53							0
SK 62	Kadruka 1	Neolithic	MAXRM1, Supragingival Lingual	s	4.9	0.46	12	1	1	1						1				4	2	3		1	2		1	10	7	17				17				1		1	2
				p	3	1.48	6	1	1	3		1				1	1	2		11	2	4	5	1		4	3	23	17	40			4	44							0
SK 69	Kadruka 1	Neolithic	MNDRM1; MNDRM2	s	1.93	0.16	12	1				2						2				3		2	1			5	6	11	2	2		15							0
SK 74	Kadruka 1	Neolithic	MNDRM1; MNDRPM3; MNDRPM4	p	5.8	0.41	6	2		1		2				2						2			1	1		7	4	11				11							0			1
SK 83	Kadruka 1	Neolithic	MNDRPM4	s	1.7	0.18	12																					0	0	0				0							0
SK 84	Kadruka 1	Neolithic	MNDRM1; MNDRM2; MNDRM3	s	1.97	0.52	12			1		1		1										1		1		3	2	5	1			6							0		1
SK 88	Kadruka 1	Neolithic	MAXPM3/4	s	1.1	0.69	12	2	1			1		3	10	14		1	1	2				4	2	1		35	7	42	3			45			1				1
				p	2.1	0.14	6					1				2									1			3	1	4	2			6							0
SK 96	Kadruka 1	Neolithic	MNDRM2/3	s	0.6	0.39	12					2						1										3	0	3				3							0
				p	2.6	0.62	6	1		1					2	2		1				1			1			7	2	9	1			10							0
SK 97	Kadruka 1	Neolithic	MNDRM2/3 Supragingival Buccal	s	3.68	0.7	12	2				2		6	2	1		2		24	3	1	2				1	42	4	46				46		1					1
SK 99	Kadruka 1	Neolithic	MAXRM1	s	1.09	0.33	24																					0	0	0				0							0
				p	4.46	0.09	6																					0	0	0				0							0
SK 101	Kadruka 1	Neolithic	MAXRM1/2	s	0.7	0.18	12																					0	0	0				0							0
SK 102	Kadruka 1	Neolithic	MAXLM1; MAXLPM3/4	s	4.1	0.32	48																					0	0	0				0							0
SK 106	Kadruka 1	Neolithic	MNDLM1/2; Supragingival Buccal	p	11.6	3.83	6	3	2		1	8	1							4	7			1	2			26	3	29	1	4		34							0
SK 110	Kadruka 1	Neolithic	MNDRPM4; MNDRM1; MNDRM2	p	5.5	3.61	6	7				1							1	5					1		1	14	2	16				16							0
SK 125	Kadruka 1	Neolithic	MAXLM3; MAXRM3	s	2.4	0.16	24																					0	0	0				0							0
SK 132	Kadruka 1	Neolithic	MNDRPM3; MNDRPM4	s	0.9	0.32	12			1		2								3				1	1			6	2	8				8							0
				p	4.9	0.44	6	1	1			1				2								4				5	4	9				9							0			5
SK 133	Kadruka 1	Neolithic	MNDLM2	s	1.1	0.14	48																					0	0	0				0							0
SK 134	Kadruka 1	Neolithic	MNDRM2; MNDRM3	s	0.57	0.22	24								3	3		5		2	1	1	1					14	2	16	1			17							0			15
				p	5.4	1.37	6			1	1	4			11	9		6	1	4		2	7		4		4	37	17	54	1	6		61							0	2		3
SK 139	Kadruka 1	Neolithic	MNDRM1/2	s	1.3	0.019	12																					0	0	0				0							0
SK 4	Kadruka 21	Neolithic	MNDLM3	s	2.15	1.02	24				1	2	2						5						3			10	3	13	3			16							0	2		1
SK 8	Kadruka 21	Neolithic	MNDLC	p	1.51	1.13	6				3										1							4	0	4		1		5							0
SK 22	Kadruka 21	Neolithic	MAXLM3	s	2.2	0.15	24			1									1		1	1			1		2	3	4	7	1	2		10							0
SK 52	Kadruka 21	Neolithic	MNDLM2/3	s	0.2	0.1	12																					0	0	0				0							0
SK 76	Kadruka 21	Neolithic	MAXLM3	s	1.83	1.37	12																		1		4	0	5	5		2		7							0
SK 80	Kadruka 21	Neolithic	MNDLM2/3	s	10.47	7.28	12	2				2	1				2				1				1		3	8	4	12	3			15							0	2
SK 87b	Kadruka 21	Neolithic	MNDLM2	p	1.18	6.7	6	1																1	2			1	3	4				4							0
SK 129	Kadruka 21	Neolithic	MNDRM2	s	2.6	0.17	48	1																				1	0	1				1							0
SK 131	Kadruka 21	Neolithic	MNDRM2	p	0.78	0.19	6																					0	0	0				0							0
SK 143	Kadruka 21	Neolithic	MNDLM2	p	1.87	1.12	6																					0	0	0				0							0
SK 172	Kadruka 21	Neolithic	MNDLM1	s	3.95	0.23	48																					0	0	0				0							0
				p	0.32	0.02	6																					0	0	0				0							0
SK 200	Kadruka 21	Neolithic	MAXLI1	s	0.5	0.2	12																					0	0	0				0							0
SK 207	Kadruka 21	Neolithic	MNDRM3	p	0.1	0.07	6																					0	0	0				0							0
SK 223	Kadruka 21	Neolithic	MNDRPM3/4; MNDRM1	p	3.8	2.7	6	7				1									1			2	2			9	4	13		2		15							0	1
SK 227	Kadruka 21	Neolithic	MNDLM1	s	3.2	0.52	12						2				3				1			1	1		1	6	3	9	1	2		12							0	1
SK 234	Kadruka 21	Neolithic	MNDRM1	s	6.9	2.1	12						1								1		5					2	5	7		2		9							0
SK 236	Kadruka 21	Neolithic	MNDLM3	s	9.43	1.42	36									1			1									2	0	2				2							0
SK 237	Kadruka 21	Neolithic	MNDRM2	p	2.3	0.15	6																					0	0	0				0							0
SK 240	Kadruka 21	Neolithic	MNDRM2	s	12.19	1.4	24	2			1																	3	0	3				3							0
				p	7	1.75	6	1																	1			1	1	2	1			3							0	1
SK 247	Kadruka 21	Neolithic	MAXRM3	p	8.1	3.2	6																					0	0	0				0							0
SK 254	Kadruka 21	Neolithic	MNDLM3	p	1	0.71	6	4				4	1			2					1				2			12	2	14			1	15							0
SK 264	Kadruka 21	Neolithic	MAXLM2	s	5.2	1.94	12	4				5	3			4	1		10					1	3		1	27	5	32		2		34							0	3		1
SK 268	Kadruka 21	Neolithic	MNDLM1/2	p	1.16	0.87	6																					0	0	0				0							0
SK 271	Kadruka 21	Neolithic	MAXLM1; MAXLM2	p	6.19	2.3	6																					0	0	0				0							0

## Sheet: Sediment Data
S2 File. Results from Dental Calculus and Sediment Samples
											Diagnostic Phytolith Morphotypes																						Non-Diagnostic Phytolith Morphotypes		Starch Granules		Other Microremains
											Grass													Tree / shrub
Grave Fill	Site	Phase	Control location	Initial sediment sample weight (g)	Amount processed for Phytoliths (g)	Acid Insoluble Fraction (g)	Extract - Phytoliths (g)	Analysed sample - Phytoliths (g)	Amount processed for Starch (g)	Analysed Extract - Starch (g)	Bilobate	Cross	Rondel	Saddle	Trapezoid	Bulliform flabellate	Elongate clavate	Elongate dentate	Elongate dendritic	Elongate sinuate	Articulate elongate (non-Interdigitate)	Interdigitate	Acute bulbosus, Papillate	Spheroid Echinate	Spheroid (psilate / ornate)	Blocky (tabular / irregular)	Tracheary (annulate / helical)	Other tree / shrub silica bodies	Total grass	Total tree / shrub	Total grass + tree / shrub	Elongate (entire / irregular)	Indeterminate	Type 1	Spicules	Feather barbule	Particulate charcoal <250µm
SK 42	Kadruka 1	Neolithic	Endocranial area	4.19513	0.3809	0.323	0.0763	0.00662	0.38867	0.00046	26			17	3	5		27	10	11			24	4	17	21		35	123	77	200	20	3		18	1	27
SK 55	Kadruka 1	Neolithic	Behind maxilla	1.13147	0.3852	0.1397	0.0268	0.00158	0.06349	0.00072	19					12		70	26		9	2		5	22	19		16	138	62	200	26	17		7		14
SK 99	Kadruka 1	Neolithic	Maxilla	0.81731	0.3837	0.3479	0.0923	0.01452	0.22869	0.00053	14	9	5	13	5	6	4	20	16	5		3	16		21	49		14	116	84	200	23	14		17		35
SK 132	Kadruka 1	Neolithic	Endocranial area	2.96314	0.3966	0.3344	0.0661	0.00717	0.31738	0.00048	28	4	7	29	2	11	11	29	2		1		8		23	27	2	16	132	68	200	15	7	1	19		23
SK 4	Kadruka 21	Neolithic	Mandible both sides	0.45492	0.2254	0.1835	0.0897	0.01201	0.11586	0.00168	14	3		7	17	13	1	7					14		45	48	3	28	76	124	200	14	15		37		46
SK 87b	Kadruka 21	Neolithic	Mandible	0.21574	0.0952	0.0579	0.0359	0.0098	0.03746	0.00029	16	1		9	10	29				2			21		35	33	5	39	88	112	200	26	18		28		38
SK 236	Kadruka 21	Neolithic	Mandibular left molars	0.29168	0.1098	0.0822	0.055	0.00786	0.04072	0.00089	31	1		10	25	13		2		3			20		20	45	3	27	105	95	200	11	4		35		29
